# Supplementary material for: Tubular graphitic-C3N4: a prospective material for energy storage and green photocatalysis
Source: Royal Society of Chemistry journal article supplement (doi:10.1039/c3ta13291a), 2013-01-01
Supplement: c3ta13291a.pdf [file c3ta13291a.pdf]

Supporting Information  
For

**Tubular graphitic-C<sub>3</sub>N<sub>4</sub>: A Prospective material for energy storage  
and green photocatalyst**

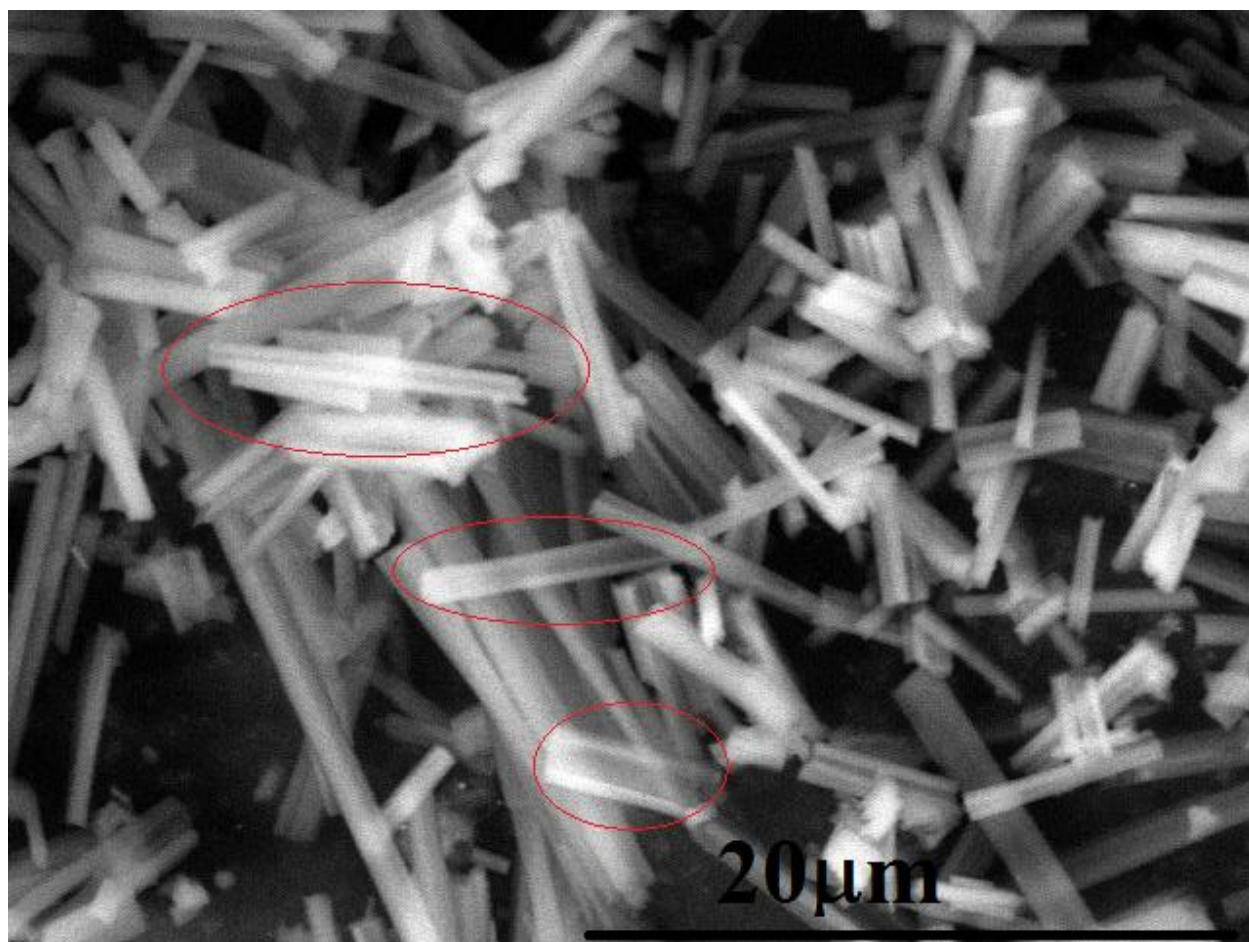

Figure S1. SEM image of tubular g-C<sub>3</sub>N<sub>4</sub>.

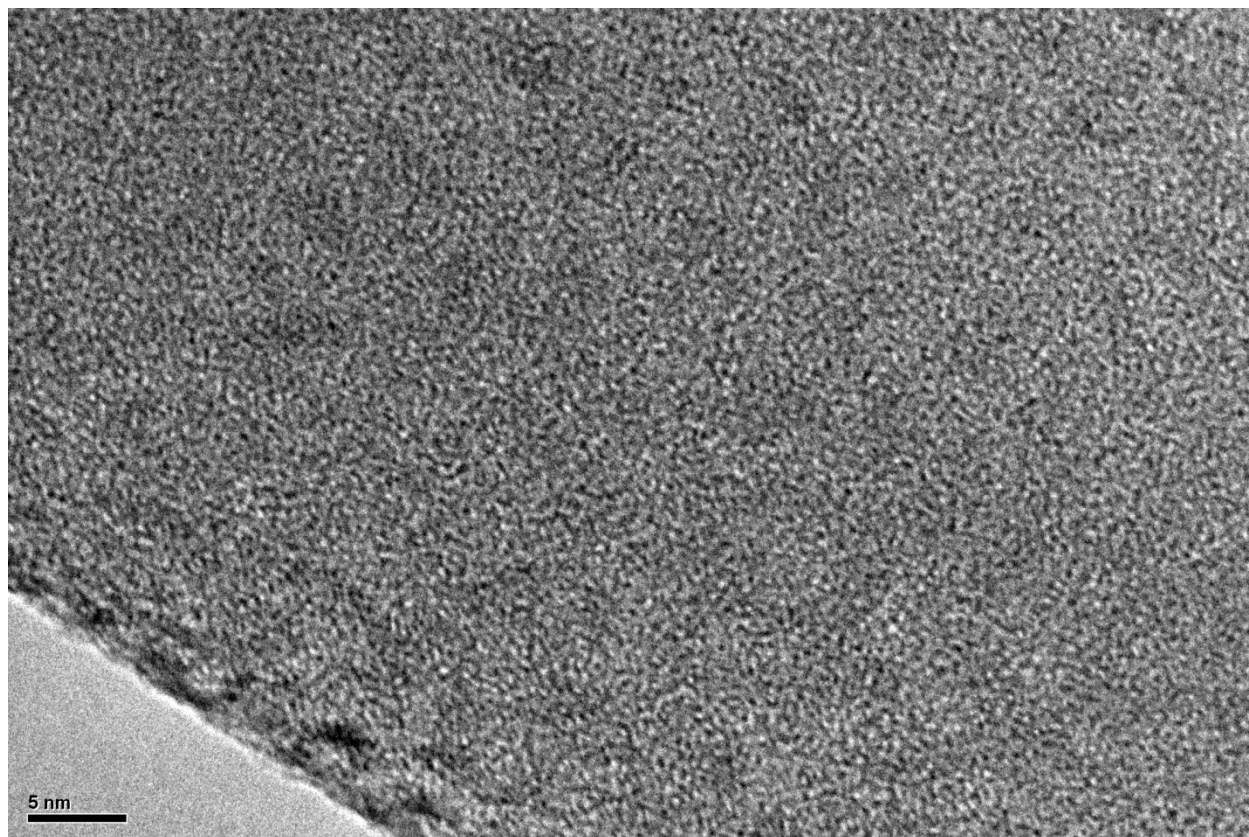

Figure S2. HRTEM image of tubular g-C<sub>3</sub>N<sub>4</sub>.

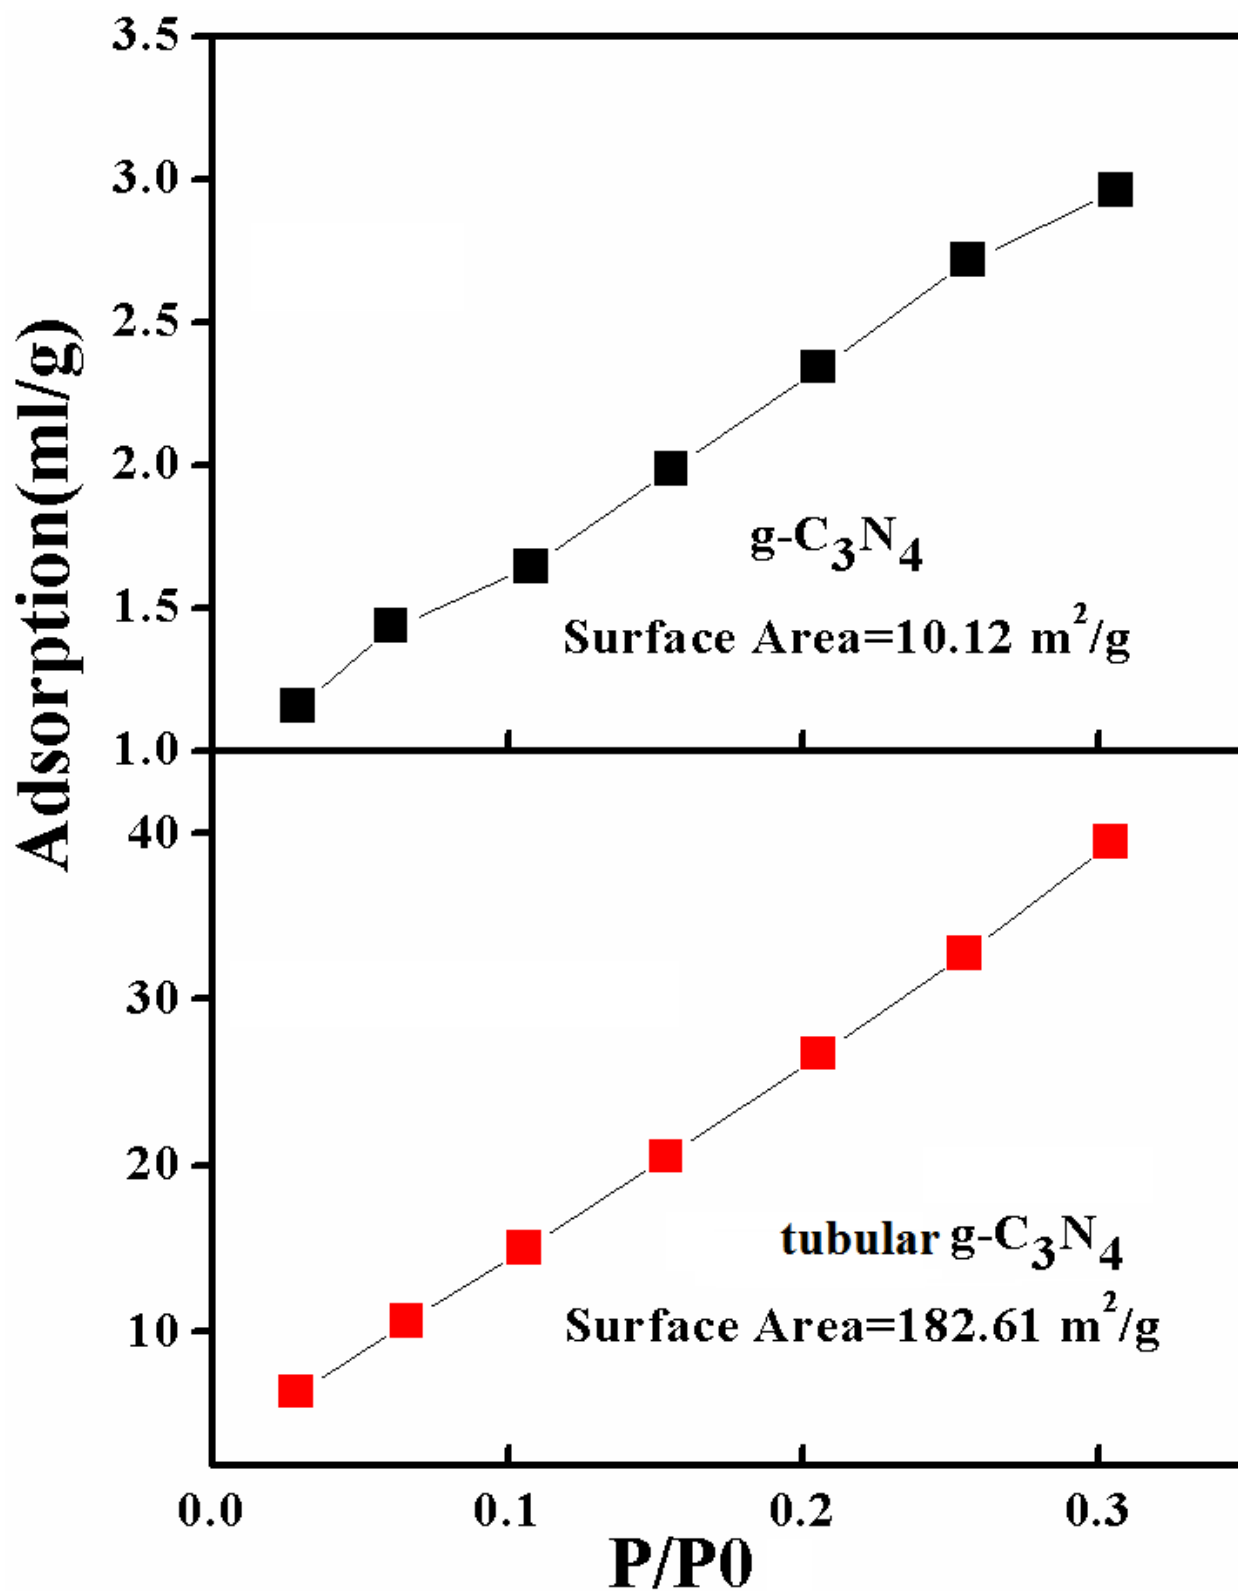

Figure S3. Nitrogen- adsorption curves of  $g-C_3N_4$  and tubular  $g-C_3N_4$  for BET surface area.

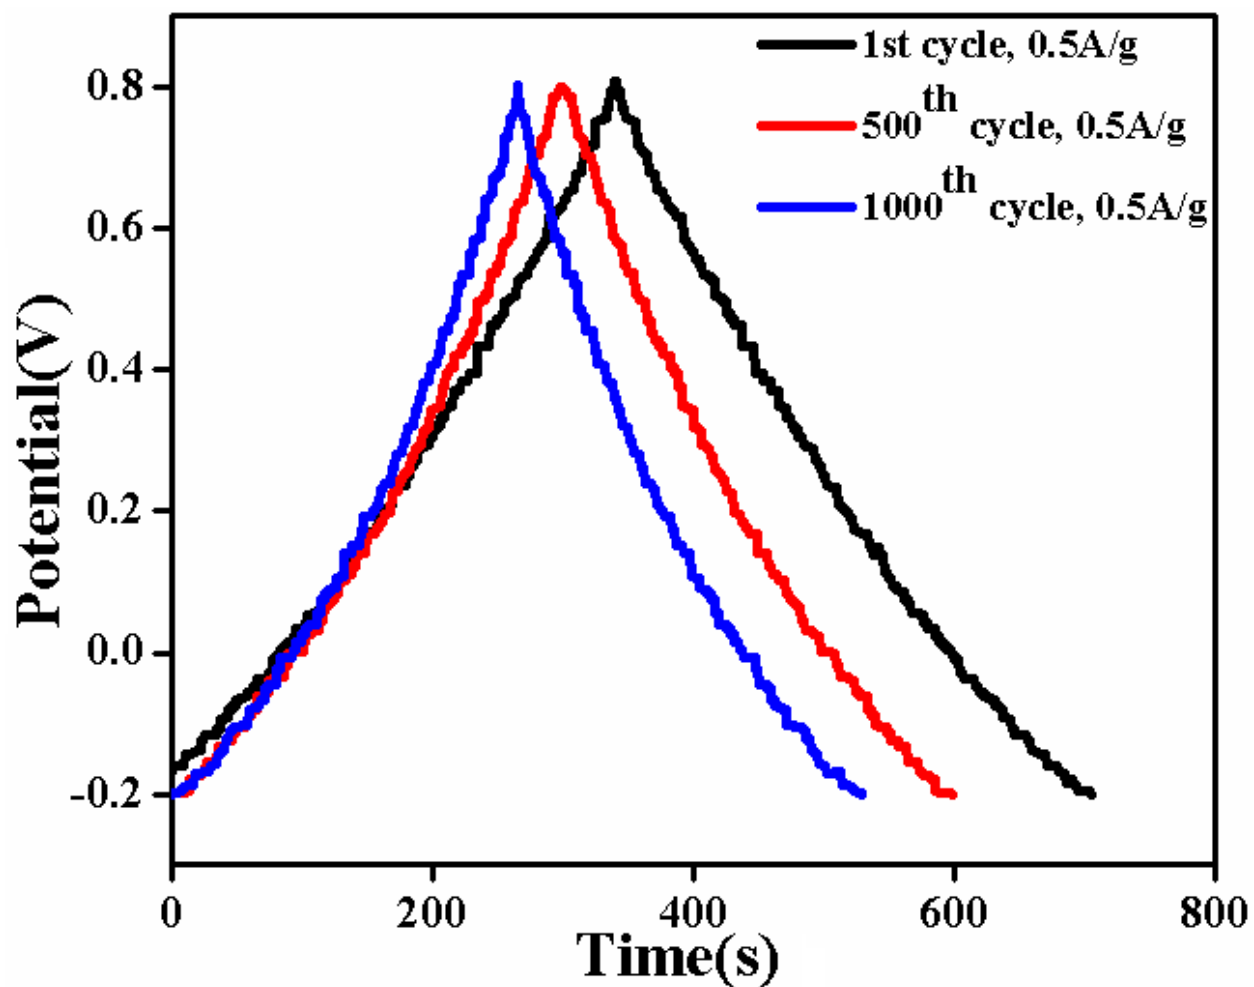

Figure S4. 1<sup>st</sup>, 500<sup>th</sup> and 1000<sup>th</sup> charging - discharging curves of g-C<sub>3</sub>N<sub>4</sub> within a potential window of -0.2 –0.8 V for current density 0.5 A/g.

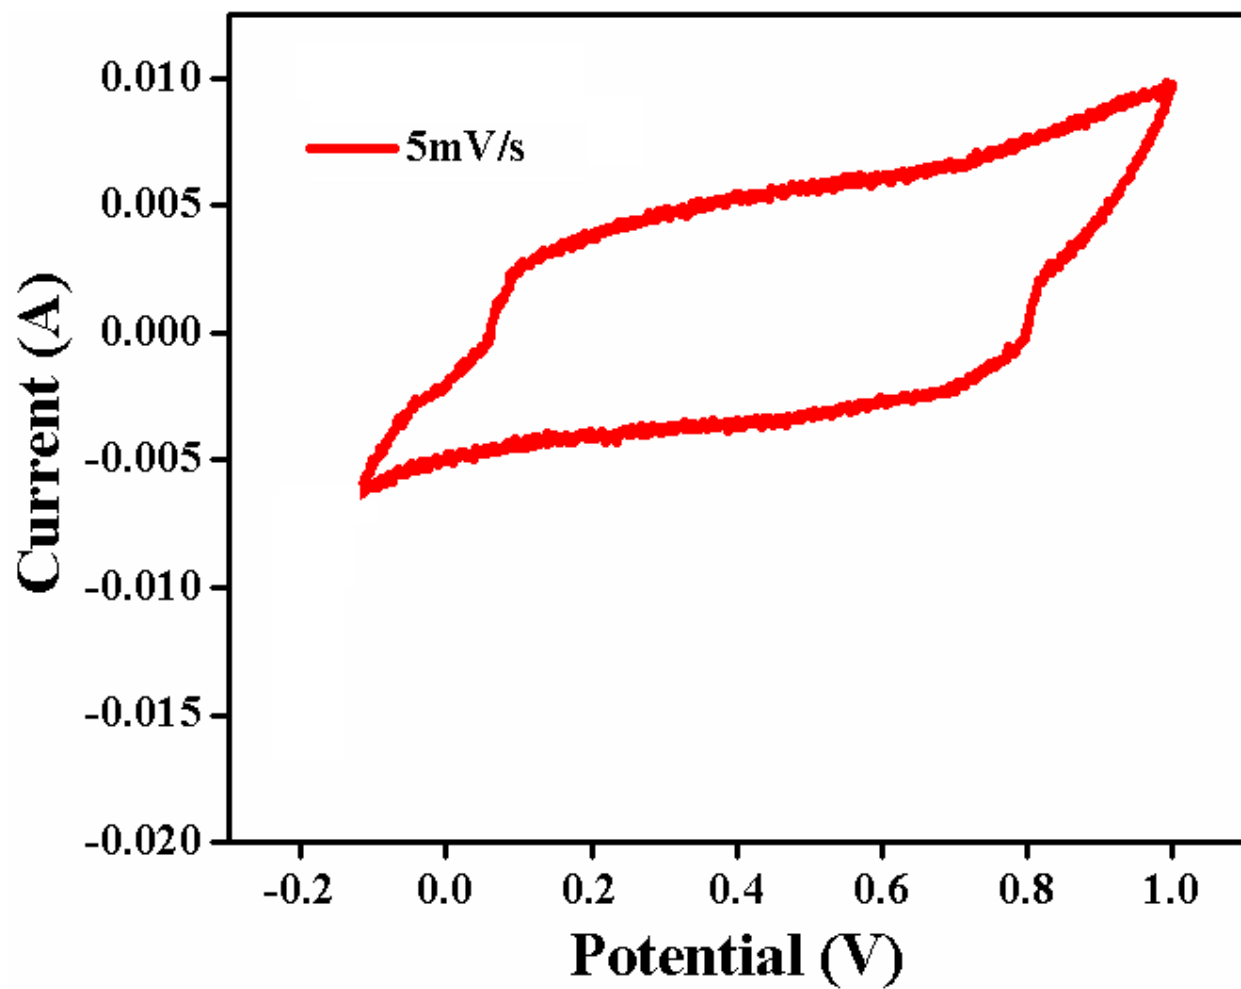

Figure S5. C-V curve of tubular g-C<sub>3</sub>N<sub>4</sub> within a potential window of -0.2 –1.0V using a three-electrode cell at a scan rate of 5mV/s.

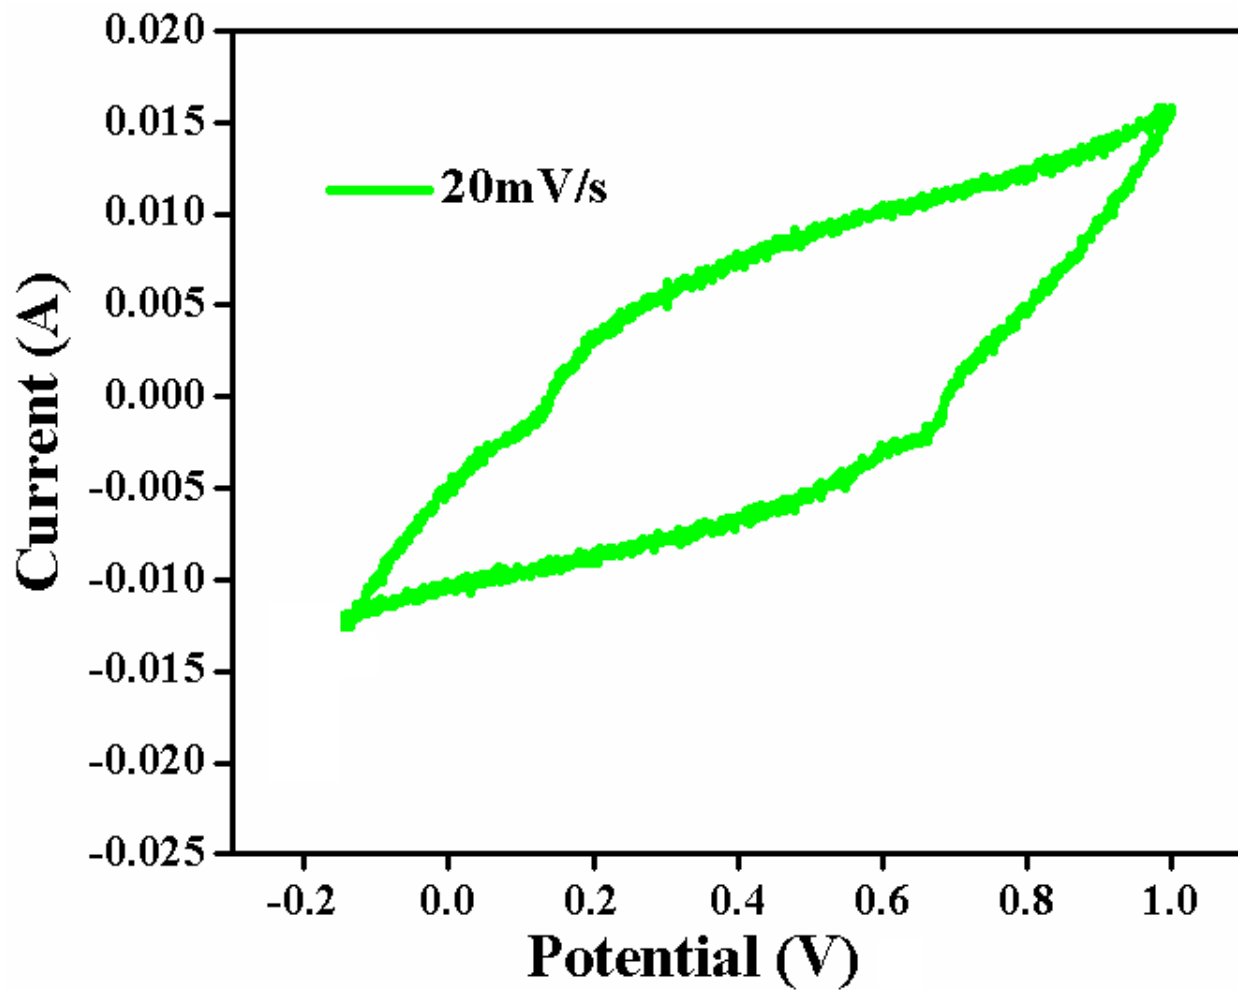

Figure S6. C-V curve of tubular g-C<sub>3</sub>N<sub>4</sub> within a potential window of -0.2 –1.0V using a three-electrode cell at a scan rate of 20mV/s.

**Table S1.** Specific capacitance comparison of the best-performing nitrogen-doped carbon materials in the literature.

| Materials                               | Electrolyte[L <sup>-1</sup> ]      | Capacitance [Fg <sup>-1</sup> ] | Current Density (Ag <sup>-1</sup> ) | Reference |
|-----------------------------------------|------------------------------------|---------------------------------|-------------------------------------|-----------|
| N-Enriched Nanocarbons                  | 1M H <sub>2</sub> SO <sub>4</sub>  | 210                             | 0.1                                 | 1         |
| N-enriched carbon                       | 1 M H <sub>2</sub> SO <sub>4</sub> | 201                             | 0.5                                 | 2         |
| MWCNTs                                  | 4 M H <sub>2</sub> SO <sub>4</sub> | 62                              | 0.2                                 | 3         |
| CNTs                                    | 6 M KOH                            | 198                             | 0.05                                | 4         |
| N-enriched carbon                       | 1 M H <sub>2</sub> SO <sub>4</sub> | 201                             | 0.5                                 | 5         |
| N-enriched carbon                       | 1 M TEABF <sub>4</sub>             | 52                              | 1mA /cm <sup>2</sup>                | 6         |
| O-rich carbons                          | 1 MH <sub>2</sub> SO <sub>4</sub>  | 198                             | 1                                   | 7         |
| N-carbon                                | 5 M H <sub>2</sub> SO <sub>4</sub> | 211                             | 1                                   | 8         |
| CNTs/ N-carbon                          | 1 M H <sub>2</sub> SO <sub>4</sub> | 100                             | 0.2                                 | 9         |
| N-Doped Graphene                        | 6 M KOH                            | 246                             | 1                                   | 10        |
| N-doped carbonnanocage                  | 6 M KOH                            | 248                             | 1                                   | 11        |
| N-Doped Carbon                          | 6 M KOH                            | 202                             | 1                                   | 12        |
| Porous 3D graphene                      | 1M TEABF <sub>4</sub>              | 231                             | 1                                   | 13        |
| Acrylonitrile–propylene                 | 1M H <sub>2</sub> SO <sub>4</sub>  | 340                             | 0.2                                 | 14        |
| Melamine                                | 6 M KOH                            | 280                             |                                     | 14        |
| Ethylene diamine–carbon tetrachloride   | 6 M KOH                            | 318                             |                                     | 14        |
| Urea–brown coal                         | 6 M KOH                            | 341                             |                                     | 14        |
| Tubular g-C <sub>3</sub> N <sub>4</sub> | 6 M KOH                            | 233                             | 0.2                                 | Our work  |



**Table S2.** First order rate constant comparison between different reported results.

| Dye | Photocatalysts                                        | k(min <sup>-1</sup> ) | Reference | Our Work |
|-----|-------------------------------------------------------|-----------------------|-----------|----------|
| MO  | Born doped g-C <sub>3</sub> N <sub>4</sub>            | 0.004                 | 15        | 0.0067   |
|     | g-C <sub>3</sub> N <sub>4</sub> at 600 <sup>0</sup> C | 0.003                 | 15        |          |
|     | g-C <sub>3</sub> N <sub>4</sub> at 580 <sup>0</sup> C | 0.004                 | 15        |          |
|     | g-C <sub>3</sub> N <sub>4</sub>                       | 0.005                 | 16        |          |
| MB  | TiO <sub>2</sub> nanotubes                            | 0.024                 | 17        | 0.021    |
|     | TiO <sub>2</sub>                                      | 0.0012                | 18        |          |
|     | g-C <sub>3</sub> N <sub>4</sub> nanoplates            | 0.0016                | 19        |          |
|     | g-C <sub>3</sub> N <sub>4</sub> nanorods              | 0.002                 | 19        |          |

## Supplementary References

1. Xiaoqing Yang, Dingcai Wu, Xiaomei Chen, Ruowen Fu, *J. Phys. Chem. C*, 2010, 114, 8581.
2. G. Lota, K. Lota, E. Frackowiak, *Electrochem. Comm.*, 2007, 9, 1828.
3. K. Jurewicz, K. Babel, R. Pietrzak, S. Dupleux, H. Wachowska, *Carbon*, 2006, 44, 2368.
4. Denisa Hulicova-Jurcakova, Masaya Kodama, Soshi Shiraishi, Hiroaki Hatori, Zong Hua Zhu, Gao Qing Lu., *Adv. Funct. Mater.*, 2009, 19, 1800.
5. E. Frackowiak, G. Lota, J. Machnikowski, C. Vix-Guterl, F. Be´guin, *Electrochim. Acta*, 2006, 51, 2209.
6. Y. J. Kim, Y. Abe, T. Yanagiura, K. C. Park, M. Shimizu, T. Iwazaki, S. Nakagawa, M. Endo, M. S. Dresselhaus, *Carbon*, 2007, 45, 2116.
7. E. Raymundo-Pinˆero, F. Leroux, F. Be´guin, *Adv. Mater.*, 2006, 18, 1877.
8. W. Li, D. Chen, Z. Li, Y. Shi, Y. Wan, J. Huang, J. Yang, D. Zhao, Z. Jiang, *Electrochem. Comm.*, 2007, 9, 569.
9. Beguin, F., Szostak, K., Lota, G., Frackowiak, E., *Adv. Mater.*, 2005, 17, 2380.
10. Zhenhai Wen, Xinchun Wang, Shun Mao, Zheng Bo, Haejune Kim, Shumao Cui, Ganhua Lu, Xinliang Feng, Junhong Chen, *Adv. Mater.*, 2012, 24, 5610
11. Yueming Tan, Chaofa Xu, Guangxu Chen, Zhaohui Liu, Ming Ma, Qingji Xie, Nanfeng Zheng, Shouzhuo Yao, *ACS Appl. Mater. Interfaces*, 2013, 5, 2241.
12. Chen, L. F., Zhang, X. D., Liang, H. W., Kong, M. Guan, Q. F. Chen, P. Wu, Z. Y. Yu, S. H. ACS Nano, 2012, 6, 7092.
13. Long Zhang, Fan Zhang, Xi Yang, Guankui Long, Yingpeng Wu, Tengfei Zhang, Kai Leng, Yi Huang, Yanfeng Ma, AoYu, Yongsheng Chen, *Scientific report*, 2013, 3, 1408.
14. Wenzhong Shen and Weibin Fan, *J. Mater. Chem. A*, 2013, 1, 999.
15. S. C. Yan, Z. S. Li, Z. G. Zou, *Langmuir*, 2010, 26, 3894.
16. Sheng Chu, Ying Wang, Yong Guo, Jianyong Feng, Cuicui Wang, Wenjun Luo, Xiaoxing Fan, Zhigang Zou. *ACS Catal.*, 2013, 3, 912.
17. Sung-Yeon Kim, Tae-Ho Lim, Tae-Sun Chang, Chae-Ho Shin, *Catalysis Letters*, 2007, 117, 112.
18. T. X. Wu, G. M. Liu, J. C. Zhao, H. Hidaka, N. Serpone, *J. Phys. Chem. B*, 1998, 102, 5845.
19. Xiaojuan Bai, Li Wang, Ruilong Zong, Yongfa Zhu, *J. Phys. Chem. C.*, DOI:10.1021/jp402062d.
